# Supplementary material
Source: PubMed Central journal article supplement (PMC4163017)
Supplement: NIHMS597378-supplement-Supporting_Information.pdf [file NIHMS597378-supplement-Supporting_Information.pdf]

## **Supporting Information**

### **Insights into the Recognition, Binding and Reactivity of Catalytic Metallodrugs Targeting Stem Loop IIb of Hepatitis C IRES RNA.**

Seth S. Bradford<sup>1+</sup>, Martin James Ross<sup>1+</sup>, Insiya Fidai<sup>1</sup> and J. A. Cowan<sup>1,2\*</sup>

Contribution from <sup>1</sup>Evans Laboratory of Chemistry, The Ohio State University, 100 West 18th Avenue, Columbus, Ohio 43210, and <sup>2</sup>MetalloPharm LLC, 1790 Riverstone Drive, Delaware, OH 43015

RECEIVED DATE (to be automatically inserted after your manuscript is accepted if required according to the journal that you are submitting your paper to)

<sup>+</sup> Authors contributed equally

<sup>\*</sup> Correspondence to: Dr. J. A. Cowan, Evans Laboratory of Chemistry, The Ohio State University, 100 West 18th Avenue, Columbus, Ohio 43210. Tel: 614 292 2703; Fax: 614 292 1685; e-mail: cowan@chemistry.ohio-state.edu

**Table SM1.** List of new mass spectrometric peaks observed after reaction with 1-Cu for 60 minutes.

| <b>Theoretical Mass</b> | <b>Observed Mass</b> | <b>Mass Error(ppm)</b> | <b>Position</b> | <b>Overhang</b>      |
|-------------------------|----------------------|------------------------|-----------------|----------------------|
| 1532.05                 | 1531.77              | -184.85                | 3               | 2,3-cyclic phosphate |
| 1861.26                 | 1861.41              | 79.06                  | 4               | 2,3-cyclic phosphate |
| 2206.47                 | 2206.80              | 151.26                 | 5               | 2,3-cyclic phosphate |
| 2535.68                 | 2536.00              | 127.96                 | 6               | 2,3-cyclic phosphate |
| 2864.89                 | 2865.43              | 187.78                 | 7               | 2,3-cyclic phosphate |
| 3539.31                 | 3539.89              | 164.81                 | 9               | 2,3-cyclic phosphate |
| 3844.49                 | 3845.06              | 147.98                 | 10              | 2,3-cyclic phosphate |
| 4189.70                 | 4190.35              | 155.97                 | 11              | 2,3-cyclic phosphate |
| 4495.87                 | 4496.30              | 95.04                  | 12              | 2,3-cyclic phosphate |
| 4801.05                 | 4801.55              | 104.43                 | 13              | 2,3-cyclic phosphate |
| 5107.22                 | 5107.76              | 106.53                 | 14              | 2,3-cyclic phosphate |
| 5436.43                 | 5436.78              | 64.51                  | 15              | 2,3-cyclic phosphate |
| 5781.64                 | 5782.25              | 105.32                 | 16              | 2,3-cyclic phosphate |
| 6086.82                 | 6087.06              | 38.81                  | 17              | 2,3-cyclic phosphate |
| 6392.00                 | 6392.28              | 43.17                  | 18              | 2,3-cyclic phosphate |
| 7027.38                 | 7027.40              | 3.55                   | 20              | 2,3-cyclic phosphate |
| 11184.93                | 11184.49             | -39.18                 | 33              | 3'-OH                |
| 2553.70                 | 2553.83              | 52.65                  | 6               | 3'-phosphate         |
| 2882.91                 | 2883.71              | 277.75                 | 7               | 3'-phosphate         |
| 3212.12                 | 3213.05              | 290.24                 | 8               | 3'-phosphate         |
| 6410.02                 | 6411.63              | 251.43                 | 18              | 3'-phosphate         |
| 6381.85                 | 6380.98              | -136.23                | 15              | 5'-OH                |
| 6052.64                 | 6051.91              | -121.23                | 16              | 5'-OH                |
| 5707.43                 | 5706.91              | -91.83                 | 17              | 5'-OH                |
| 5402.25                 | 5401.74              | -93.57                 | 18              | 5'-OH                |
| 5097.07                 | 5096.66              | -79.87                 | 19              | 5'-OH                |
| 4767.86                 | 4767.04              | -171.87                | 20              | 5'-OH                |

|         |         |         |    |              |
|---------|---------|---------|----|--------------|
| 4461.69 | 4461.19 | -112.29 | 21 | 5'-OH        |
| 4116.48 | 4116.24 | -58.56  | 22 | 5'-OH        |
| 3771.27 | 3771.03 | -64.69  | 23 | 5'-OH        |
| 3466.09 | 3465.79 | -87.16  | 24 | 5'-OH        |
| 3120.88 | 3120.57 | -99.56  | 25 | 5'-OH        |
| 2814.71 | 2814.47 | -84.71  | 26 | 5'-OH        |
| 2508.54 | 2508.59 | 18.73   | 27 | 5'-OH        |
| 2179.33 | 2179.15 | -82.42  | 28 | 5'-OH        |
| 1834.12 | 1833.88 | -132.13 | 29 | 5'-OH        |
| 1527.95 | 1528.00 | 30.82   | 30 | 5'-OH        |
| 2588.52 | 2588.00 | -201.31 | 27 | 5'-phosphate |

**Table SM2.** List of mass spectrometric peaks observed after reaction with 2-Cu for 60 minutes.

| <b>Theoretical Mass</b> | <b>Observed Mass</b> | <b>Mass Error(ppm)</b> | <b>Position</b> | <b>Overhang</b>      |
|-------------------------|----------------------|------------------------|-----------------|----------------------|
| 1861.26                 | 1861.51              | 134.05                 | 4               | 2,3-cyclic phosphate |
| 2206.47                 | 2206.75              | 124.77                 | 5               | 2,3-cyclic phosphate |
| 2864.89                 | 2865.19              | 105.16                 | 7               | 2,3-cyclic phosphate |
| 3194.10                 | 3194.54              | 139.08                 | 8               | 2,3-cyclic phosphate |
| 3539.31                 | 3539.69              | 107.64                 | 9               | 2,3-cyclic phosphate |
| 3844.49                 | 3844.76              | 70.23                  | 10              | 2,3-cyclic phosphate |
| 4801.05                 | 4801.16              | 22.46                  | 13              | 2,3-cyclic phosphate |
| 5107.22                 | 5107.34              | 22.86                  | 14              | 2,3-cyclic phosphate |
| 5436.43                 | 5435.94              | -90.75                 | 15              | 2,3-cyclic phosphate |
| 6392.00                 | 6391.74              | -40.35                 | 18              | 2,3-cyclic phosphate |
| 1550.07                 | 1550.00              | -43.19                 | 3               | 3'-phosphate         |
| 1879.28                 | 1879.77              | 262.35                 | 4               | 3'-phosphate         |
| 2553.70                 | 2553.43              | -105.85                | 6               | 3'-phosphate         |
| 5097.07                 | 5096.66              | -81.20                 | 19              | 5'-OH                |
| 4461.69                 | 4461.50              | -41.83                 | 21              | 5'-OH                |
| 4116.48                 | 4116.50              | 5.05                   | 22              | 5'-OH                |
| 3771.27                 | 3771.30              | 8.18                   | 23              | 5'-OH                |
| 3466.09                 | 3465.98              | -32.93                 | 24              | 5'-OH                |
| 2814.71                 | 2814.68              | -10.84                 | 26              | 5'-OH                |
| 2508.54                 | 2508.64              | 38.22                  | 27              | 5'-OH                |
| 2179.33                 | 2179.36              | 11.80                  | 28              | 5'-OH                |
| 1834.12                 | 1833.79              | -179.99                | 29              | 5'-OH                |
| 1527.95                 | 1527.89              | -37.27                 | 30              | 5'-OH                |
| 1914.10                 | 1914.42              | 164.90                 | 29              | 5'-phosphate         |
| 1607.93                 | 1607.94              | 6.45                   | 30              | 5'-phosphate         |

**Table SM3.** Subcluster assignments of 1-Cu based on proximity of the copper atom to the site of reactivity as determined by mass spectrometry.

| Pose | Atom | RNA Residue | RNA Atom | Distance Å | Assigned Cluster |
|------|------|-------------|----------|------------|------------------|
| 2    | Cu   | U12         | OP1      | 1.4        | U14              |
| 6    | Cu   | C13         | OP1      | 1.5        | U14              |
| 7    | Cu   | U12         | OP2      | 2.2        | U14              |
| 11   | Cu   | U12         | OP1      | 1.6        | U14              |
| 15   | Cu   | U12         | OP1      | 1.6        | U14              |
| 16   | Cu   | U12         | OP2      | 4          | U14              |
| 19   | Cu   | C13         | OP2      | 1.6        | U14              |
| 26   | Cu   | U14         | O4       | 2.3        | U14              |
| 27   | Cu   | C13         | OP2      | 3.7        | U14              |
| 32   | Cu   | C13         | OP1      | 2.9        | U14              |
| 33   | Cu   | U14         | OP2      | 1.7        | U14              |
| 35   | Cu   | C13         | OP2      | 1.6        | U14              |
| 36   | Cu   | U12         | OP2      | 4.2        | U14              |
| 37   | Cu   | C13         | OP2      | 1.7        | U14              |
| 39   | Cu   | U14         | O4       | 2.8        | U14              |
| 44   | Cu   | U14         | OP2      | 4.3        | U14              |
| 10   | Cu   | C18         | OP1      | 1.4        | C18              |
| 25   | Cu   | C18         | OP1      | 4.2        | C18              |
| 31   | Cu   | C18         | OP1      | 1.7        | C18              |
| 38   | Cu   | C18         | OP1      | 1.6        | C18              |
| 45   | Cu   | G16         | OP2      | 6.4        | C18              |
| 1    | Cu   | A19         | OP2      | 1.7        | A19              |
| 17   | Cu   | A19         | OP2      | 4.4        | A19              |
| 22   | Cu   | A19         | OP2      | 3.2        | A19              |
| 23   | Cu   | A19         | OP2      | 4.1        | A19              |
| 28   | Cu   | A19         | OP2      | 4.2        | A19              |
| 29   | Cu   | A19         | OP2      | 8          | A19              |
| 40   | Cu   | A19         | OP2      | 5.5        | A19              |
| 42   | Cu   | A19         | OP2      | 3.1        | A19              |
| 43   | Cu   | A19         | OP2      | 3.5        | A19              |
| 3    | Cu   | C10         | OP2      | 1.5        | G21              |
| 4    | Cu   | U20         | OP2      | 3.4        | G21              |
| 5    | Cu   | U20         | OP2      | 1.7        | G21              |
| 8    | Cu   | C10         | OP2      | 1.9        | G21              |
| 9    | Cu   | U20         | OP2      | 1.6        | G21              |
| 12   | Cu   | G9          | OP2      | 2.3        | G21              |

|    |    |     |     |     |     |
|----|----|-----|-----|-----|-----|
| 13 | Cu | C10 | OP2 | 1.5 | G21 |
| 18 | Cu | C10 | OP1 | 2.9 | G21 |
| 20 | Cu | C10 | OP1 | 2   | G21 |
| 21 | Cu | G9  | OP1 | 1.6 | G21 |
| 24 | Cu | G11 | OP1 | 1.7 | G21 |
| 30 | Cu | U20 | OP2 | 1.8 | G21 |
| 34 | Cu | C10 | OP2 | 1.7 | G21 |
| 36 | Cu | U12 | OP2 | 4.2 | G21 |
| 41 | Cu | U20 | OP2 | 1.6 | G21 |

**Table SM4.** Subcluster assignments of 2-Cu based on proximity of the copper atom to the site of reactivity as determined by mass spectrometry.

| Pose | Atom | RNA Residue | RNA Atom | Distance Å | Assigned Cluster |
|------|------|-------------|----------|------------|------------------|
| 25   | Cu   | A6          | OP1      | 3.8        | A6               |
| 27   | Cu   | A6          | OP1      | 2.8        | A6               |
| 29   | Cu   | A6          | OP1      | 4.8        | A6               |
| 33   | Cu   | A6          | HO2'     | 2.7        | A6               |
| 76   | Cu   | A6          | OP1      | 3.6        | A6               |
| 87   | Cu   | A6          | OP2      | 4.2        | A6               |
| 14   | Cu   | A7          | OP1      | 3.5        | A7               |
| 17   | Cu   | A7          | OP1      | 1.7        | A7               |
| 22   | Cu   | A7          | OP1      | 1.4        | A7               |
| 30   | Cu   | A7          | OP1      | 1.7        | A7               |
| 34   | Cu   | A7          | OP1      | 2.6        | A7               |
| 38   | Cu   | A7          | OP1      | 2.1        | A7               |
| 39   | Cu   | A7          | OP1      | 1.3        | A7               |
| 40   | Cu   | A7          | OP1      | 1.6        | A7               |
| 42   | Cu   | A7          | OP1      | 4.5        | A7               |
| 43   | Cu   | A7          | OP1      | 1.6        | A7               |
| 50   | Cu   | A7          | OP1      | 1.7        | A7               |
| 59   | Cu   | A7          | OP1      | 1.6        | A7               |
| 74   | Cu   | A7          | OP2      | 4          | A7               |
| 78   | Cu   | A7          | OP1      | 2.8        | A7               |
| 1    | Cu   | A8          | OP1      | 1.5        | A8               |
| 3    | Cu   | A8          | OP1      | 2.4        | A8               |
| 5    | Cu   | A8          | OP1      | 1.7        | A8               |
| 6    | Cu   | A8          | OP1      | 1.6        | A8               |
| 7    | Cu   | A8          | OP1      | 4.7        | A8               |
| 8    | Cu   | A8          | OP1      | 3.4        | A8               |
| 10   | Cu   | A8          | OP1      | 1.6        | A8               |
| 16   | Cu   | A8          | OP1      | 1.5        | A8               |
| 19   | Cu   | A8          | OP1      | 1.7        | A8               |
| 20   | Cu   | A8          | OP1      | 1.5        | A8               |
| 24   | Cu   | A8          | OP1      | 2.2        | A8               |
| 32   | Cu   | A8          | OP1      | 2          | A8               |
| 35   | Cu   | A8          | OP1      | 1.5        | A8               |
| 36   | Cu   | A8          | OP1      | 1.6        | A8               |
| 41   | Cu   | A8          | OP1      | 3.1        | A8               |
| 51   | Cu   | A8          | OP1      | 1.5        | A8               |

|    |    |     |     |     |     |
|----|----|-----|-----|-----|-----|
| 53 | Cu | A8  | OP1 | 1.8 | A8  |
| 55 | Cu | A8  | OP1 | 1.5 | A8  |
| 57 | Cu | A8  | OP2 | 4.4 | A8  |
| 60 | Cu | A8  | OP1 | 3.1 | A8  |
| 62 | Cu | A8  | OP1 | 1.9 | A8  |
| 66 | Cu | A8  | OP1 | 4.9 | A8  |
| 69 | Cu | A8  | OP1 | 5   | A8  |
| 72 | Cu | A8  | OP1 | 1.6 | A8  |
| 77 | Cu | A8  | OP2 | 3.7 | A8  |
| 82 | Cu | A8  | OP2 | 3.2 | A8  |
| 83 | Cu | A8  | OP1 | 1.5 | A8  |
| 9  | Cu | C23 | OP2 | 3.7 | C23 |
| 15 | Cu | C23 | OP2 | 2.6 | C23 |
| 61 | Cu | C23 | OP2 | 4.1 | C23 |
| 64 | Cu | C23 | OP1 | 6.6 | C23 |
| 68 | Cu | C23 | OP2 | 3.6 | C23 |
| 73 | Cu | C23 | OP2 | 4.1 | C23 |
| 85 | Cu | C23 | OP2 | 2.5 | C23 |
| 86 | Cu | C23 | OP2 | 4   | C23 |
| 2  | Cu | G22 | OP1 | 1.6 | G22 |
| 21 | Cu | G22 | OP2 | 3.3 | G22 |
| 31 | Cu | G22 | OP2 | 3.8 | G22 |
| 37 | Cu | G22 | OP2 | 1.7 | G22 |
| 44 | Cu | G22 | OP1 | 3.6 | G22 |
| 46 | Cu | G22 | OP1 | 3.8 | G22 |
| 47 | Cu | G22 | OP2 | 1.7 | G22 |
| 48 | Cu | G22 | OP1 | 1.5 | G22 |
| 52 | Cu | G22 | OP2 | 1.7 | G22 |
| 54 | Cu | G22 | OP1 | 3.6 | G22 |
| 67 | Cu | G22 | OP2 | 2.3 | G22 |
| 71 | Cu | G22 | OP2 | 4.2 | G22 |
| 81 | Cu | G22 | OP1 | 4.4 | G22 |
| 84 | Cu | G22 | OP1 | 1.4 | G22 |
| 88 | Cu | G22 | OP1 | 2.6 | G22 |



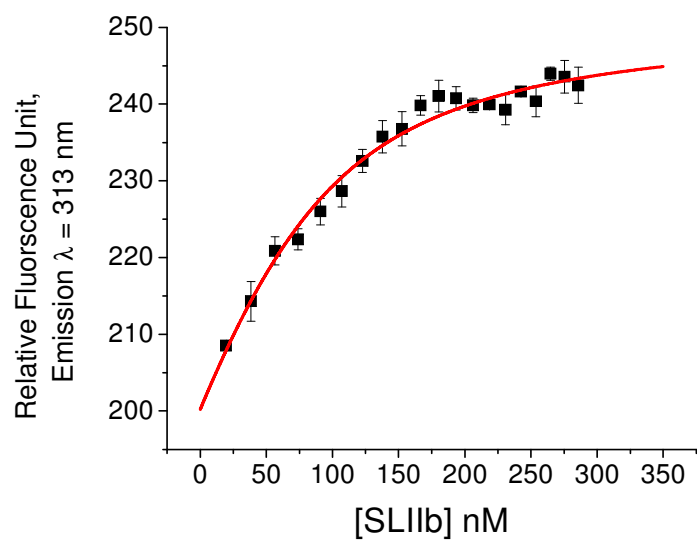

**Figure SM1.** The determination of  $K_D$  for **2** via changes in tyrosine fluorescence.  $K_D = 76 \text{ nM} \pm 3 \text{ nM}$ .

$[\mathbf{2}\text{-Cu}] = 84 \text{ nM}$  ,  $[\text{HEPES}] = 20 \text{ mM}$ ,  $[\text{NaCl}] = 100 \text{ mM}$ ,  $\text{pH} = 7.4$ .

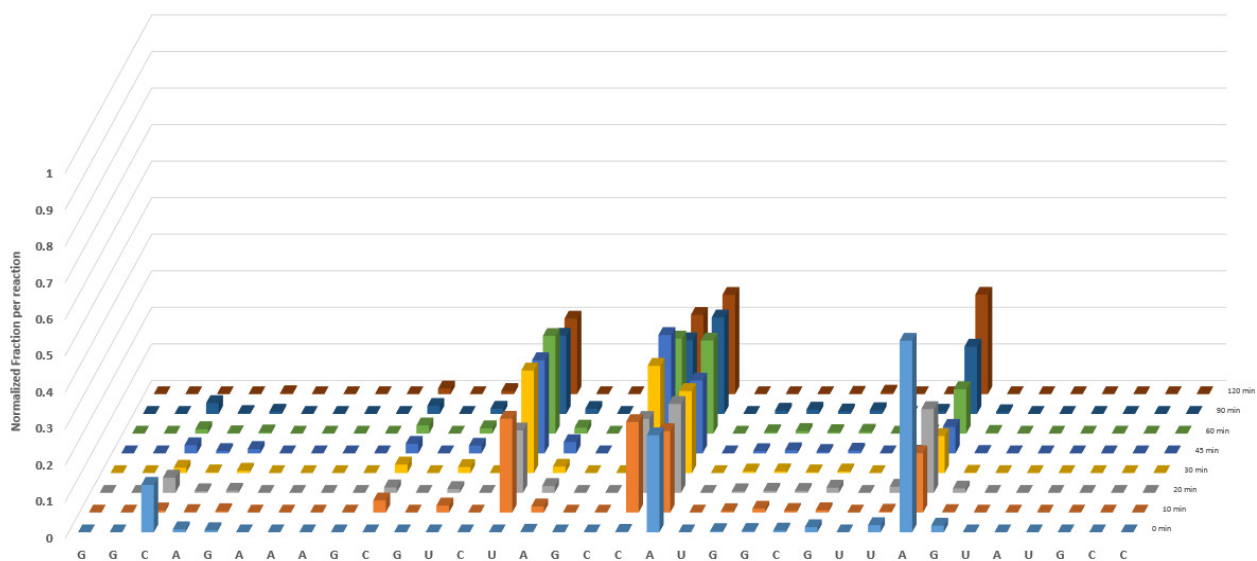

**Figure SM2.** Summary of cleavage sites on SLIIB RNA promoted by **1-Cu** as determined by mass spectrometric measurements. The plot shows the formation of products at each position as a function of time following reaction with **1-Cu** in the presence of co-reagents. Reaction sites are defined as those with products at six or more time points.

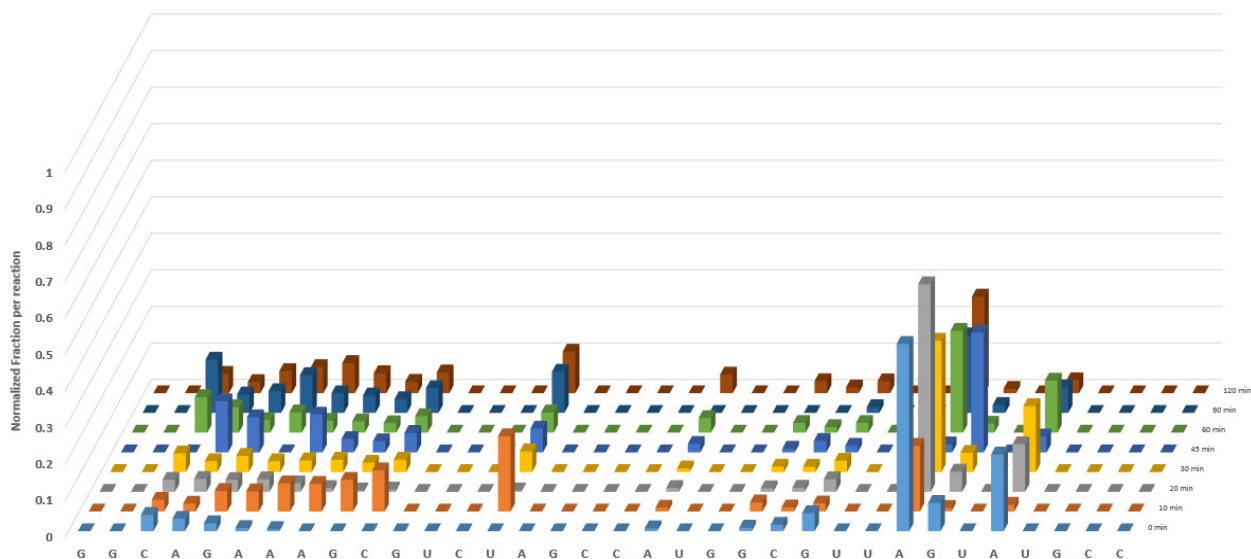

**Figure SM3.** Summary of cleavage sites on SLIIB RNA promoted by **2-Cu** as determined by spectrometric measurements. The plot shows the formation of products at each position as a function of time following reaction with **2-Cu** in the presence of co-reagents. Reaction sites are defined as those with products at six or more time points.

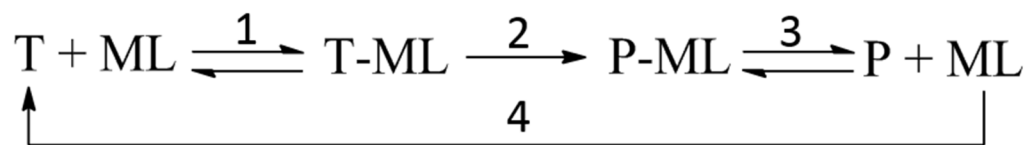

1. Binding affinity to target
2. Effectiveness in facilitating chemistry
3. Release of catalyst
4. Turnover

**Figure SM4.** A summary of the properties expected to contribute to and influence the effectiveness of catalytic metallodrugs. Unlike traditional drugs, the binding affinity to the target is only one of the factors that influence the effectiveness of the catalytic drug. Further, there needs to be a balance between the affinity to the target and the release of the therapeutic agent from the modified target.

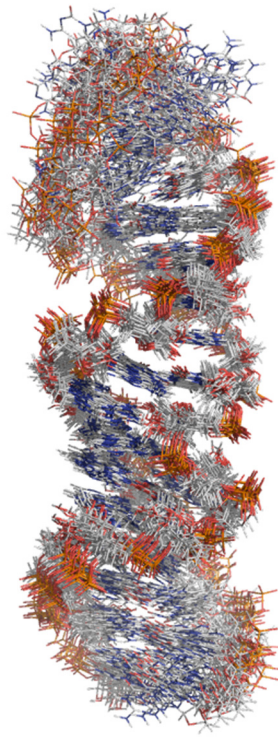

**Figure SM5.** Overlap of the 20 NMR structures available in the PDB file 1P5N. The top of the RNA is the most dynamic portion of stem loop IIb, while the rest is more rigid.

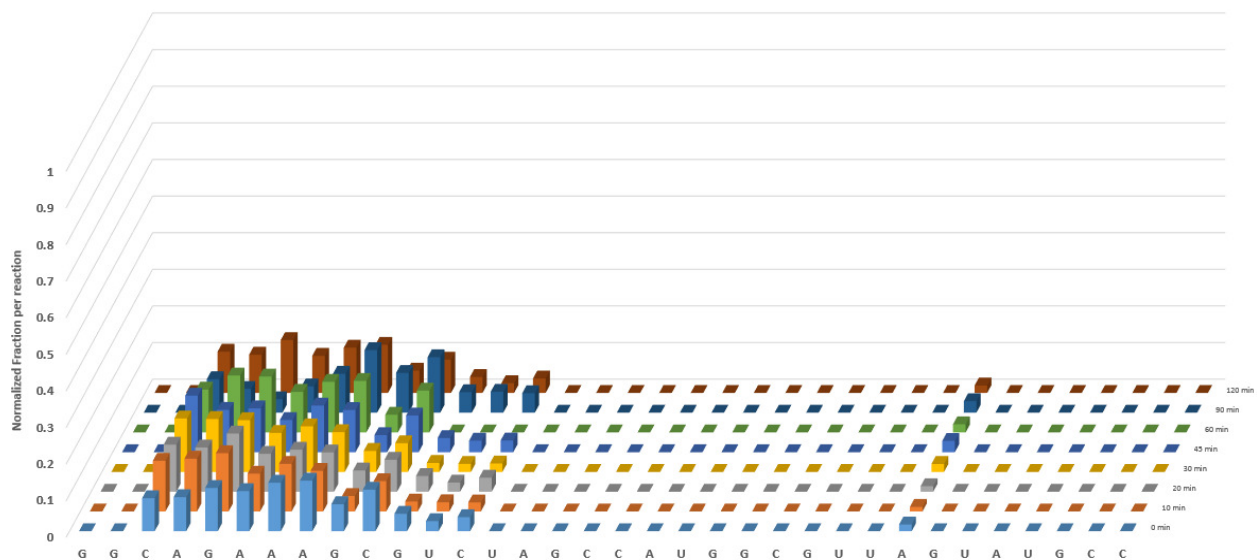

**Figure SM6.** Summary of cleavage sites on SLIIb RNA by 1-Cu as determined by mass spectrometry, showing the formation of products at each position as a function of time following reaction mediated by catalyst in the absence of co-reagents. Reaction sites are those with products at six or more time points.

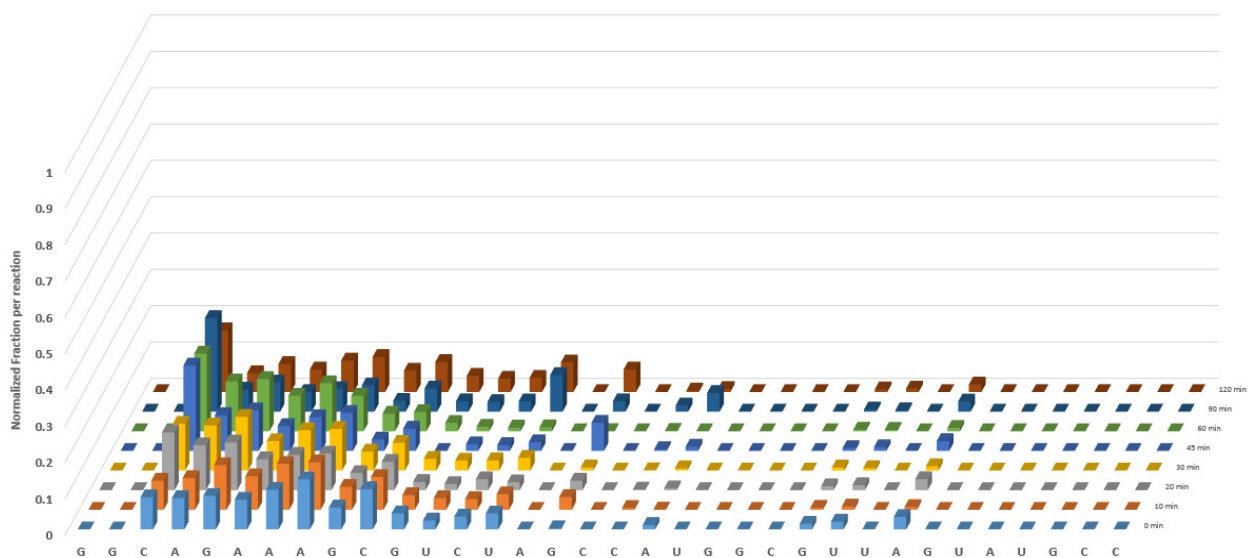

**Figure SM7.** Summary of cleavage sites on SLIIb RNA by **2-Cu** as determined by mass spectrometry, showing the formation of products at each position as a function of time following reaction mediated by catalyst in the absence of co-reagents. Reaction sites are those with products at six or more time points.

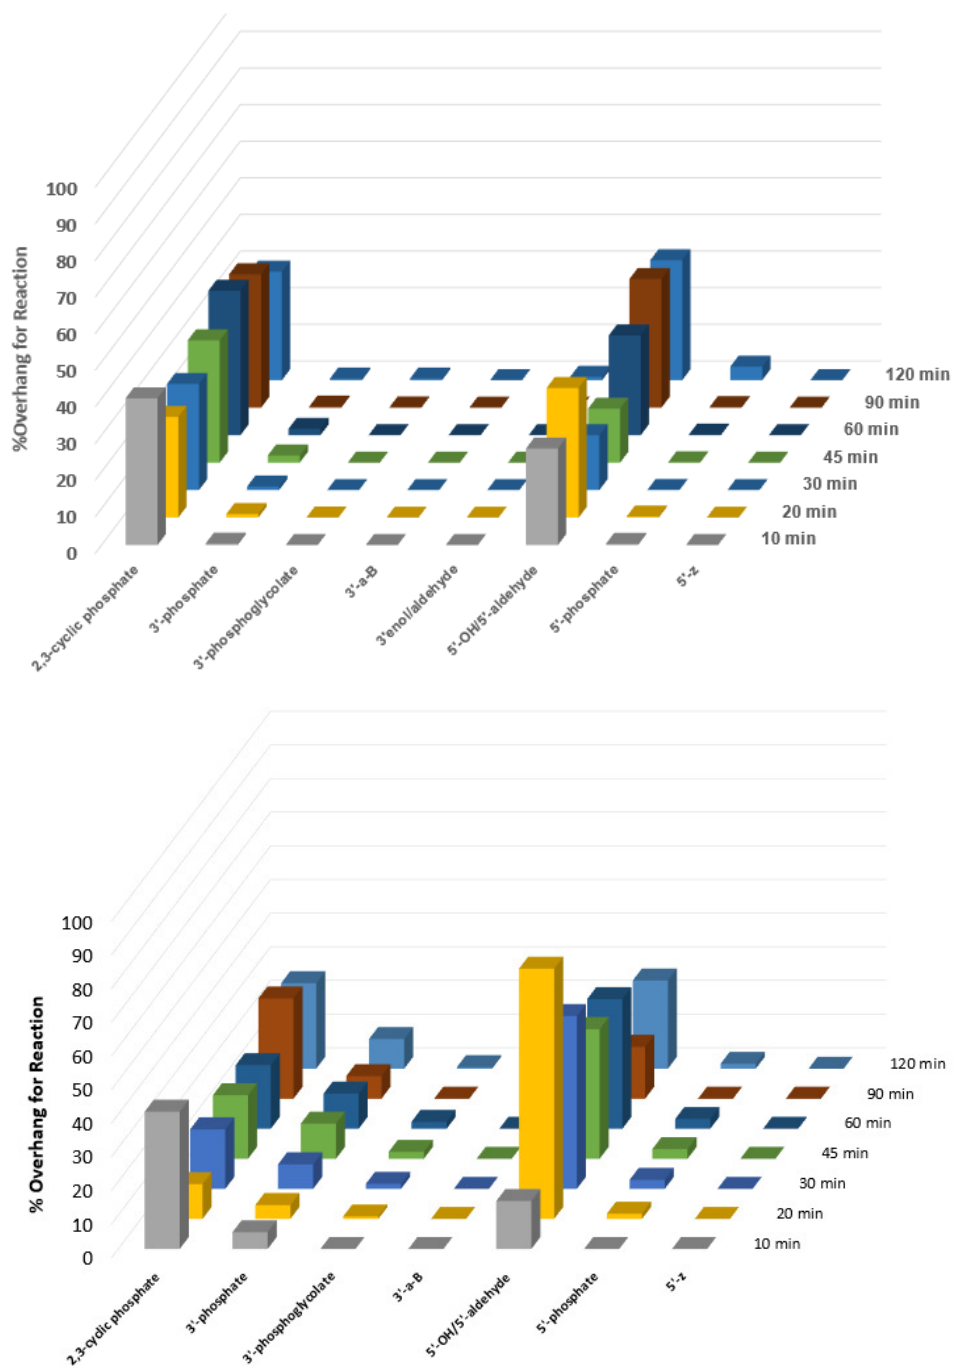

**Figure SM8.** Relative amounts of each class of product observed by mass spectrometry displayed as a function of time following reaction with **1-Cu** (top) and **2-Cu** (bottom). **1-Cu** produced almost exclusively 2',3'-cyclic phosphates for the 3'-overhang whereas for **2-Cu** the relative amounts were about two-thirds 2',3'-cyclic phosphates and one-third 3'-phosphates.



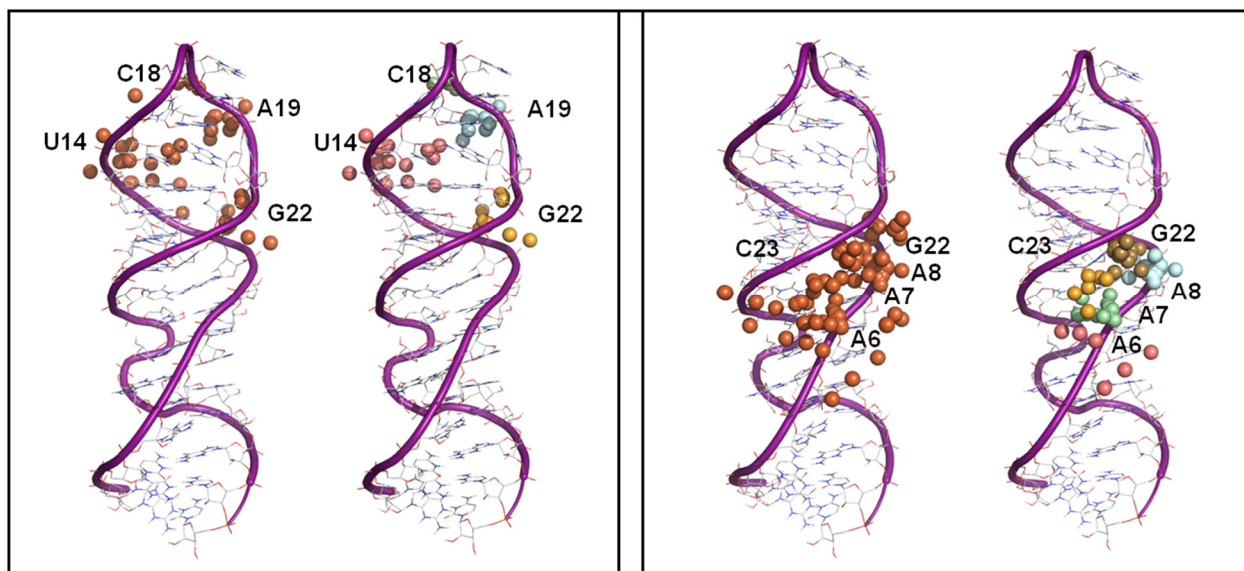

**Figure SM9.** (Colored variant of Figure 6). The metal ion, shown as a sphere, for each bound metalloprotein conformer from docking to the top conformation of the NMR structure of SLIIB in Autodock. (Left box, left image) Positions of the docked metal ion for each conformation of the RNA-complexed metalloprotein 1-Cu. (Left box, right image) The subclusters of metal ions distributed around bases (individually color-coded) which correspond to experimentally observed sites of reaction for 1-Cu (pink, U14; green C18; blue, A19; yellow, G22). (Right box, left image) Positions of the docked metal ion for each conformation of the RNA-complexed metalloprotein 2-Cu. (Right box, right image) The subclusters of metal ions distributed around bases which correspond to experimentally observed sites of reaction for 2-Cu (pink, A6; green A7; blue A8; yellow, C23; brown, G22).

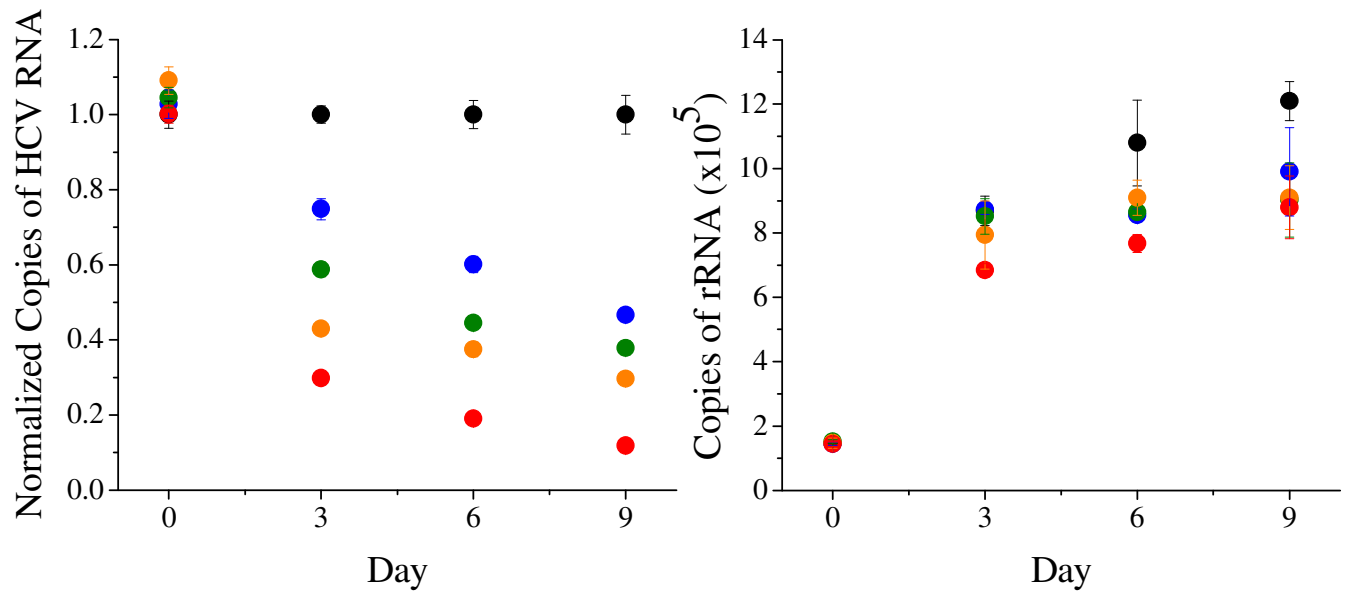

**Figure SM10.** (Colored variant for Figure 7). RT-PCR results showing the preferential cleavage of HCV RNA (left) over ribosomal RNA (right) at increasing dosages of **1-Cu**. 0 μM (black), 2.5 μM (blue), 5 μM (green), 10 μM (orange), 20 μM (red). The graph on the left is normalized to the RNA levels in the absence of metallopeptide.

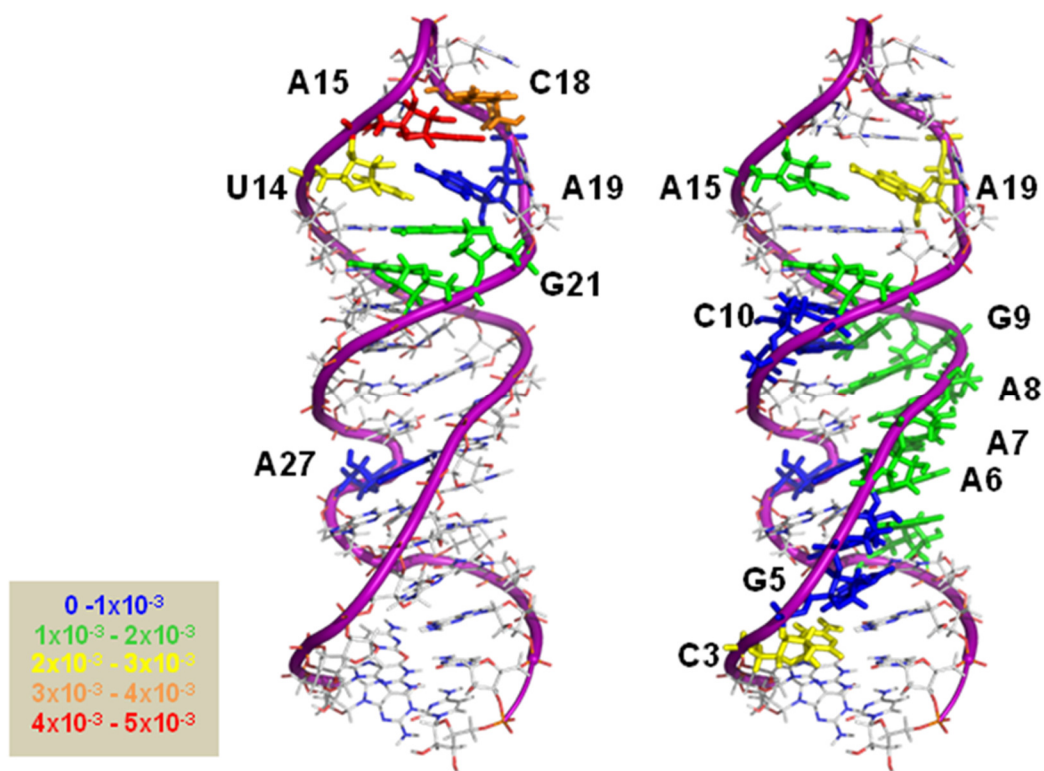

**Figure SM11.** (Colored variant for Figure 8). Sites of reactivity based on MALDI assignments of fragments that show a time dependence in the presence of **1-Cu** with SLIIb (left) and **2-Cu** with SLIIb (right). The scale reflects the relative initial velocity for reaction at each position with time (per minute) as described in the experimental section.

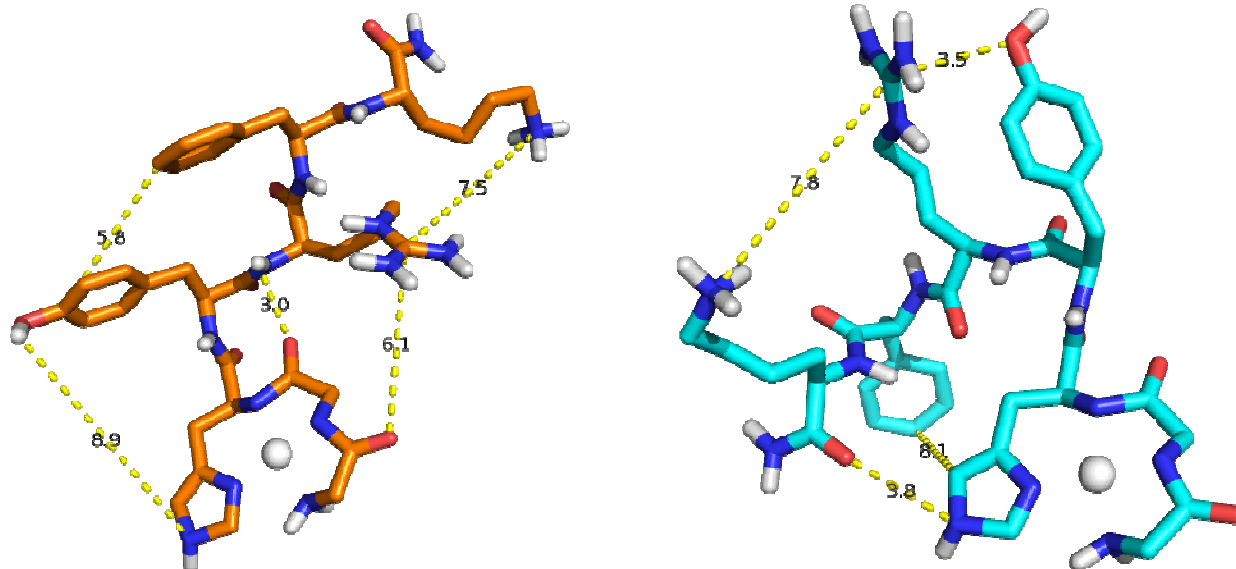

**Figure SM12.** The optimized solution structures of Cu-GGHYrFK-amide (left) and Cu-GGhyrfk-amide (right). Distances are shown in Angstroms. Structures were optimized in Gaussian and images were produced in PyMol.

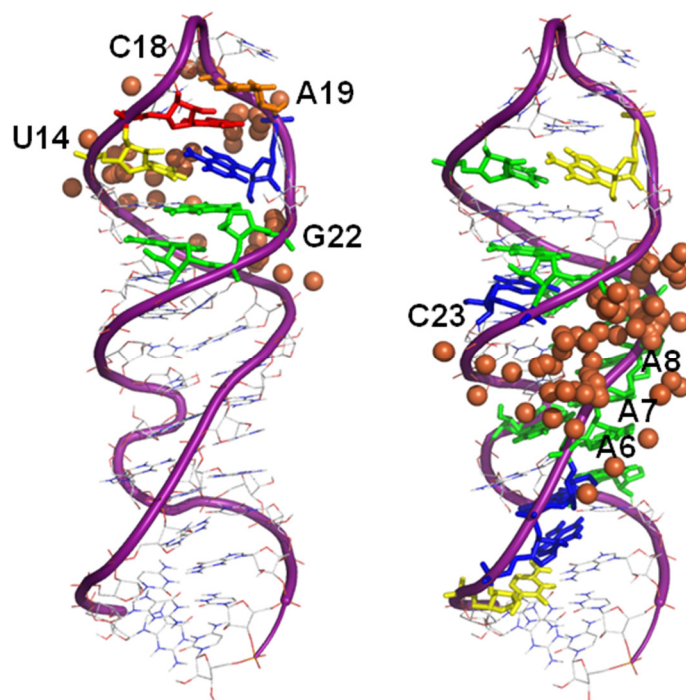

**Figure SM13.** (Colored variant for Figure 11). Comparison of the reactive sites based upon the MALDI-TOF MS, the colored residues, (Figure SM11) overlaid with the simulated binding proposed by Autodock, orange spheres represent copper atoms, (Figure SM9) for **1-Cu** (left), and **2-Cu** (right).
